# Supplementary material
Source: PubMed Central journal article supplement (PMC6681988)
Supplement: ao9b01272_si_001.pdf [file ao9b01272_si_001.pdf]

# SUPPORTING INFORMATION

## Sustained Release of Vascular Endothelial Growth Factor (VEGF) from Poly( $\epsilon$ -caprolactone-PEG- $\epsilon$ -caprolactone)-*b*-poly(L-lactide) Multi-block Copolymer Microspheres

Karina C. Scheiner<sup>1</sup>, Roel F. Maas-Bakker<sup>1</sup>, Thanh T. Nguyen<sup>2</sup>, Ana M. Duarte<sup>2</sup>, Gert Hendriks<sup>2</sup>, Lidia Sequeira<sup>2</sup>, Garry P. Duffy<sup>3</sup>, Rob Steendam<sup>2</sup>, Wim E. Hennink<sup>1</sup>, Robbert J. Kok<sup>1,\*</sup>

<sup>1</sup> Department of Pharmaceutics, Utrecht Institute of Pharmaceutical Sciences, Utrecht University, Universiteitsweg 99, 3584 CG Utrecht, the Netherlands

<sup>2</sup> InnoCore Pharmaceuticals B.V., L.J. Zielstraweg 1, 9713 GX Groningen, the Netherlands

<sup>3</sup> Discipline of Anatomy, School of Medicine, National University of Ireland Galway, University Road, Galway, Ireland

### AUTHOR INFORMATION

\*Corresponding Author: Dr. R.J. Kok, Department of Pharmaceutics, Utrecht Institute for Pharmaceutical Sciences, Utrecht University, Universiteitsweg 99, 3584 CG Utrecht, the Netherlands. Phone: + 31 620275995, Fax: + 31 30 251789. Email: [r.j.kok@uu.nl](mailto:r.j.kok@uu.nl)

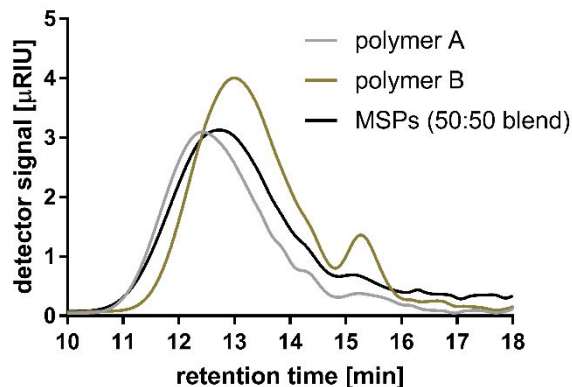

Figure S1: GPC chromatograms of multi-block copolymers A and B (“polymer A” and “polymer B”), and of (placebo) microspheres prepared with a 50:50 blend of polymer A and B (MSPs: microspheres).

Table S1: Molecular weights of multi-block copolymers A and B and placebo microspheres.

|                                               | $M_n$ [kDa] | $M_w$ [kDa] | $M_p$ [kDa] | PDI<br>[ $M_w / M_n$ ] |
|-----------------------------------------------|-------------|-------------|-------------|------------------------|
| <b>polymer A</b>                              | 21.7        | 53.7        | 52.4        | 2.59                   |
| <b>polymer B</b>                              | 13.7        | 31.6        | 30.5        | 2.31                   |
| <b>placebo microspheres<br/>(50:50 blend)</b> | 17.2        | 45.6        | 39.1        | 2.64                   |

Polymer A: multi-block copolymer A, Polymer B: multi-block copolymer B. Placebo microspheres (50:50 blend): Microspheres prepared with a 50:50 blend of polymer A and B. Molecular weights are based on GPC measurements (as shown in figure S1).

Table S2: Size characteristics of VEGF-loaded microspheres ( 0.2 wt% target loading) prepared with various polymer A and B blends.

| <b>blend ratio<br/>polymer A : polymer B</b> | <b>average size [<math>\mu\text{m}</math>] ; CV [%]</b> |
|----------------------------------------------|---------------------------------------------------------|
| 100:0                                        | 45 ; 14                                                 |
| 90:10                                        | n.d.*                                                   |
| 80:20                                        | 46 ; 28                                                 |
| 70:30                                        | 51 ; 12                                                 |
| 60:40                                        | 42 ; 16                                                 |
| 50:50                                        | 48 ; 21                                                 |
| 0:100                                        | 43 ; 28                                                 |

\*not determined.

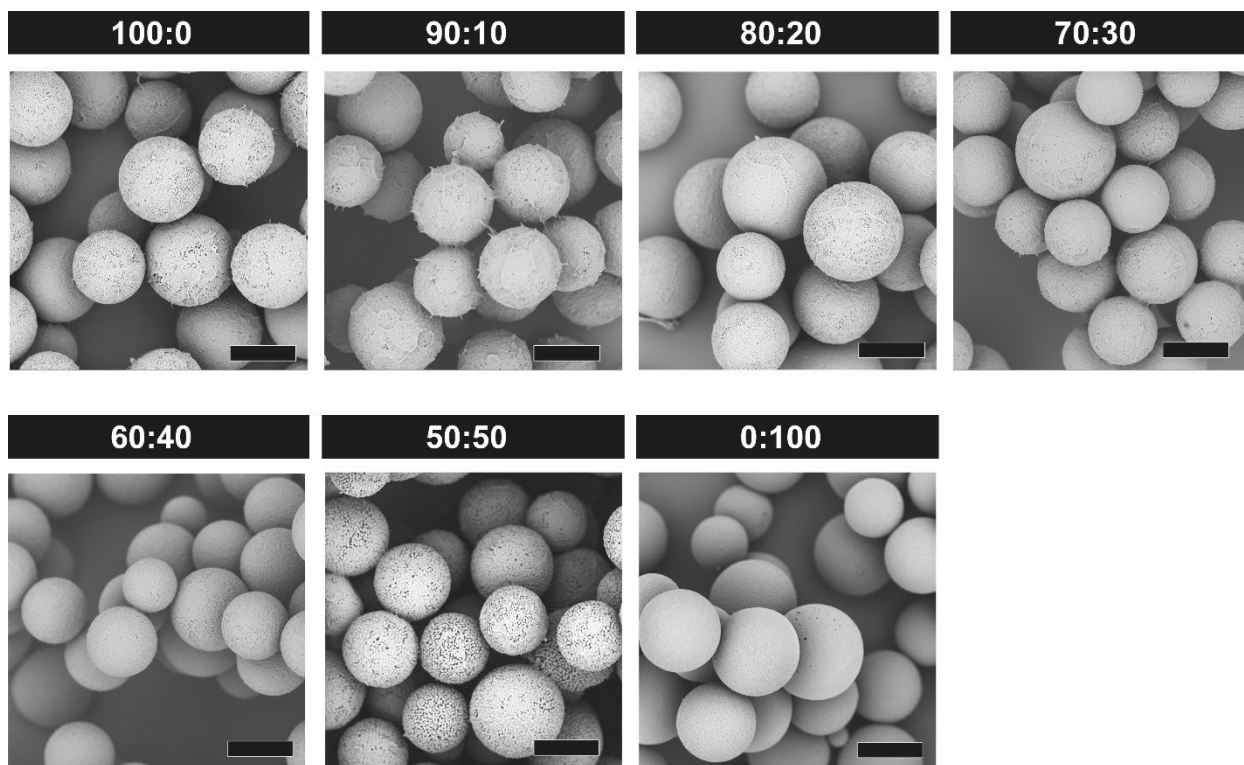

Figure S2: SEM images of VEGF-loaded microspheres (0.2 wt% target loading). The blend ratio of polymer A and B used for each batch is indicated on the bar above each image. Black scale bar represents 30 μm.

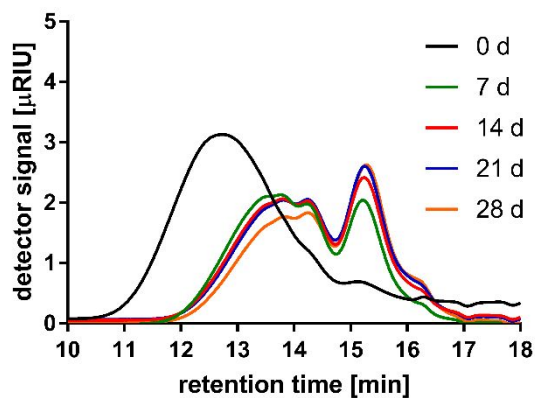

Figure S3: GPC chromatograms of (placebo) microsphere degradation samples. The time of incubation in IVR buffer (PBS pH 7.4, supplemented with 0.025% Tween 20 and 0.02% NaN<sub>3</sub>) at 37 °C is indicated in the legend (d: days). The GPC chromatogram of freshly prepared microspheres is shown in black (“0 d”).

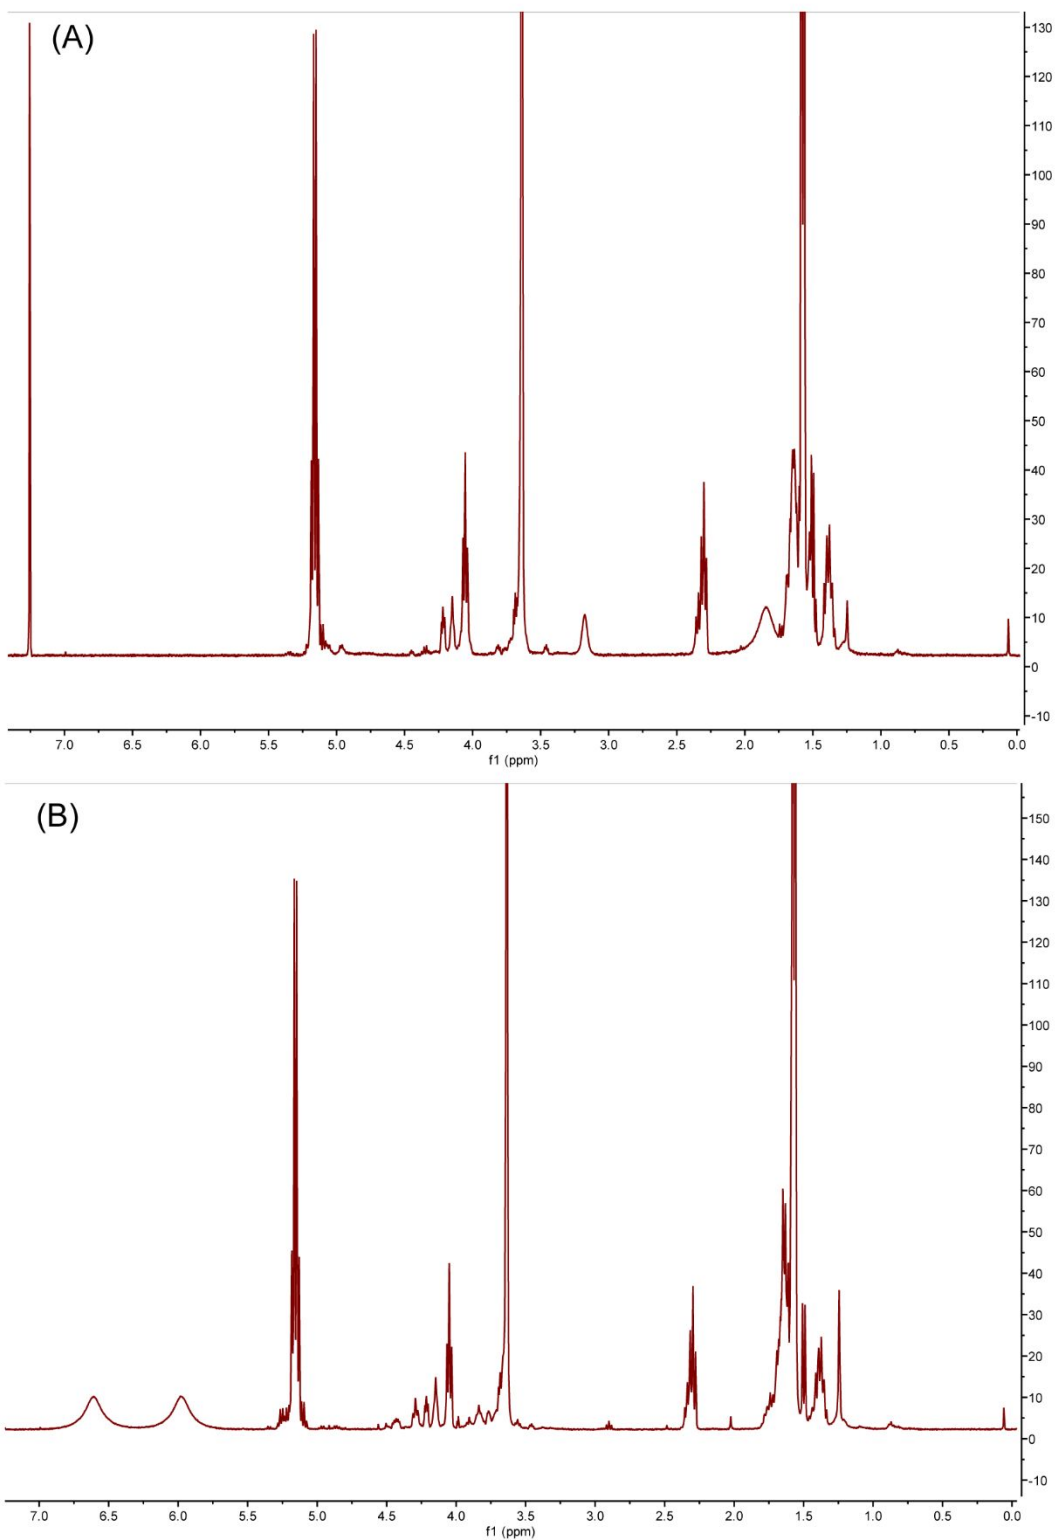

Figure S4:  $^1\text{H-NMR}$  spectra of freeze-dried placebo microspheres directly after preparation (A). Figure B: After addition of shift reagent TAIC a small additional peak at  $\sim \delta$  4.5 is visible.

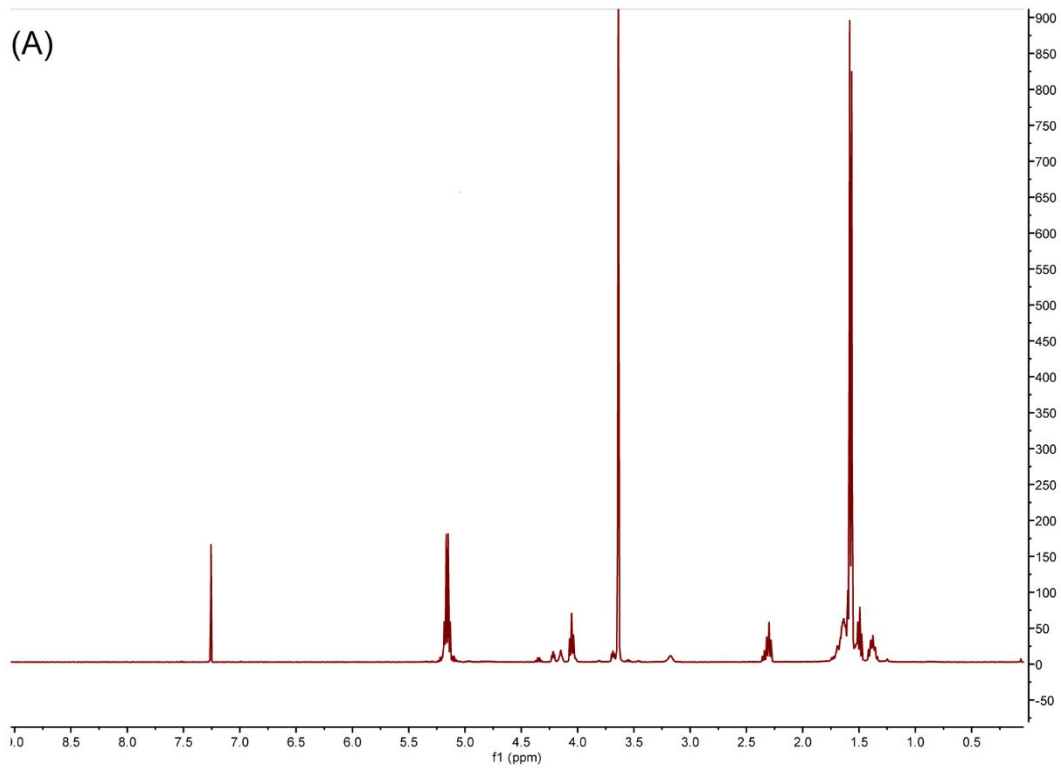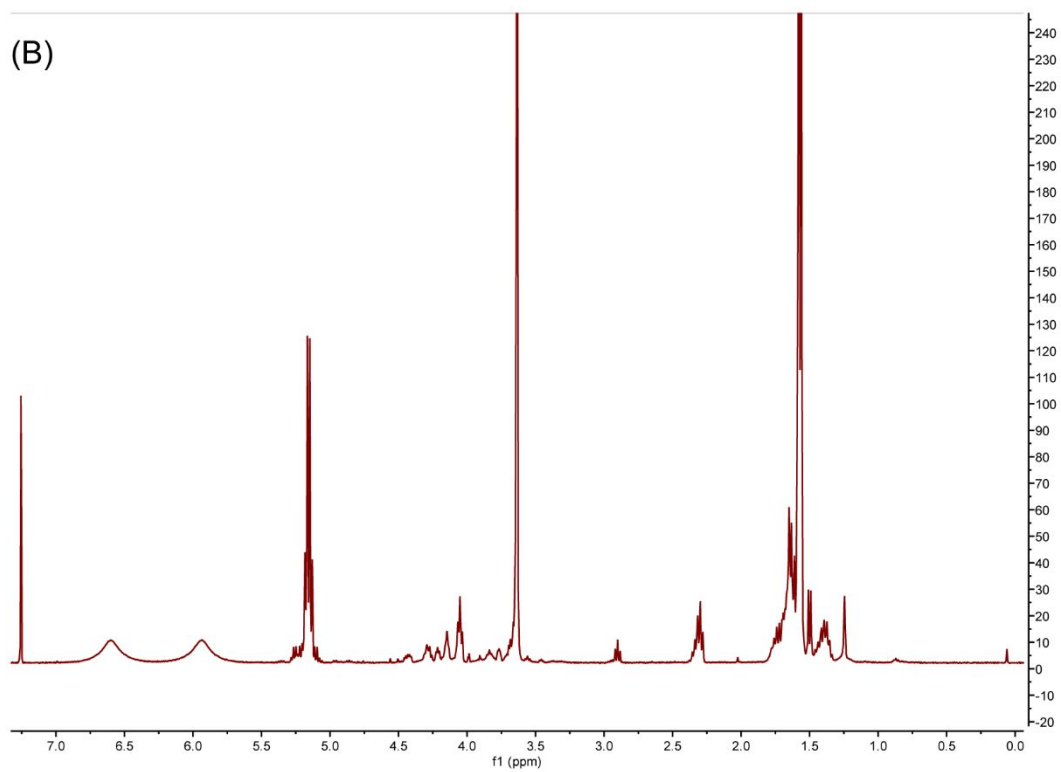

Figure S5:  $^1\text{H-NMR}$  spectra of freeze-dried placebo microspheres after incubation in IVR buffer (PBS pH 7.4, 0.025% Tween 20, 0.02%  $\text{NaN}_3$ ) at 37 °C for 28 days (figure A). Figure B: After addition of shift reagent TAIC a small additional peak at  $\sim \delta 4.5$  is visible.

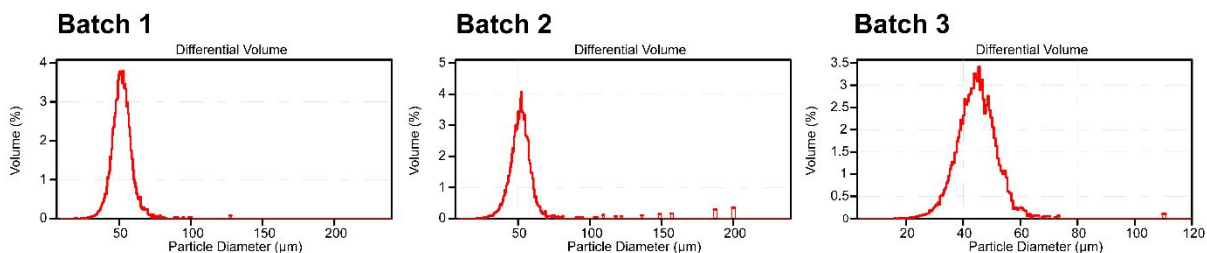

Figure S6: Size distribution plots, measured by Coulter Counter, of 3 microsphere batches prepared with 50:50 blend ratio of polymer A and B, 1 wt% target VEGF loading.

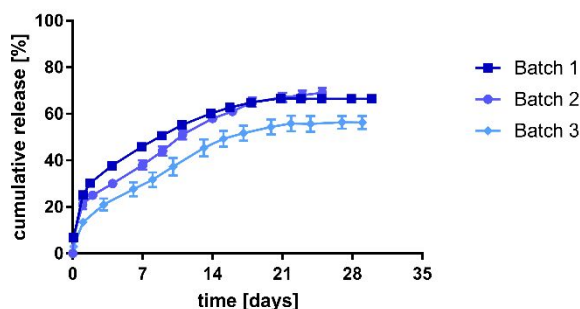

Figure S7: Cumulative release of VEGF from three microsphere batches (50:50 blend ratio polymer A and B) prepared with a target VEGF loading of 1wt%. The release was performed at 37 °C in IVR buffer (PBS pH 7.4, supplemented with 0.025% Tween 20 and 0.02%  $\text{NaN}_3$ ). Released VEGF was quantified by SE-UPLC.

Table S3: VEGF quantification by SE-UPLC and ELISA.

| theoretical VEGF concentration [ $\mu\text{g/ml}$ ] | measured VEGF concentration [ $\mu\text{g/ml}$ ] |            |
|-----------------------------------------------------|--------------------------------------------------|------------|
|                                                     | SE-UPLC                                          | ELISA      |
| 6                                                   | $6 \pm 0$                                        | $4 \pm 0$  |
| 16                                                  | $60 \pm 1$                                       | $44 \pm 2$ |
| 160                                                 | $158 \pm 0$                                      | $92 \pm 3$ |

Theoretical concentrations [ $\mu\text{g/ml}$ ] are based on the amount of lyophilized VEGF per vial, as received by the supplier. The content of a vial (1 mg lyophilized VEGF) was reconstituted in 1 ml IVR buffer, resulting in a 1 mg/ml VEGF solution. This solution was further diluted to the concentrations stated in this table.

Table S4: Quantification of released and freshly spiked VEGF by SE-UPLC and ELISA.

| IVR sample | VEGF spike [ $\mu\text{g/ml}$ ] | measured VEGF concentration [ $\mu\text{g/ml}$ ] |            |
|------------|---------------------------------|--------------------------------------------------|------------|
|            |                                 | SE-UPLC                                          | ELISA      |
| Day 1      | 0                               | $18 \pm 0$                                       | $5 \pm 1$  |
|            | 50                              | $70 \pm 1$                                       | $45 \pm 4$ |
| Day 11     | 0                               | $8 \pm 0$                                        | $3 \pm 0$  |
|            | 50                              | $57 \pm 0$                                       | $32 \pm 1$ |
| Day 18     | 0                               | $5 \pm 0$                                        | $2 \pm 0$  |
|            | 50                              | $55 \pm 1$                                       | $38 \pm 9$ |
| -          | 50                              | $52 \pm 1$                                       | $31 \pm 1$ |

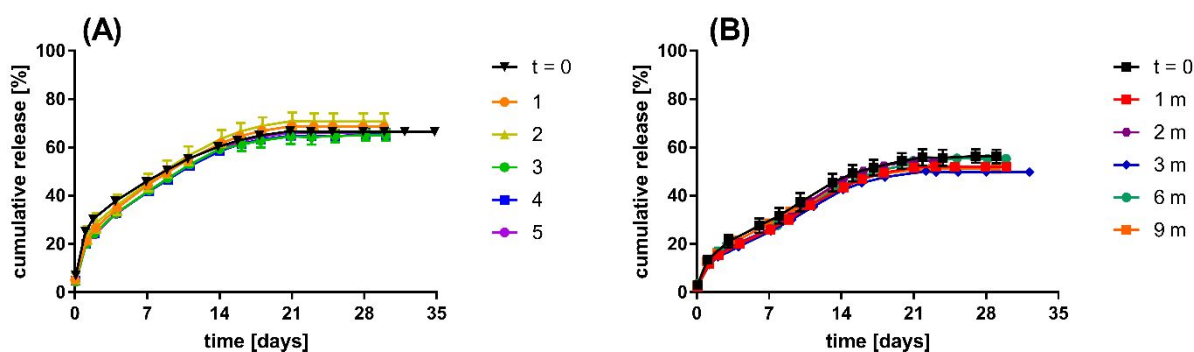

Figure S8: Cumulative release of VEGF [%] from freeze-dried microspheres. A: after repeated freezing and storage  $-20\text{ }^{\circ}\text{C}$ , B: after long-term storage at  $-20\text{ }^{\circ}\text{C}$  for 1, 2, 3, 6 months compared to directly after freeze-drying ( $t=0$ ). The release was performed at  $37\text{ }^{\circ}\text{C}$  in PBS pH 7.4, supplemented with 0.025% Tween 20 and 0.02%  $\text{NaN}_3$ . Released VEGF was quantified by SE-UPLC.

Table S5: Similarity factor  $f_2$  of VEGF release curves from microspheres after 1 to 5 times of freezing to and storage at  $-20\text{ }^{\circ}\text{C}$  compared to VEGF release curve from microspheres after preparation and freeze-drying.

| freezing cycles | $f_2$ |
|-----------------|-------|
| 1               | 81    |

|   |    |
|---|----|
| 2 | 74 |
| 3 | 74 |
| 4 | 74 |
| 5 | 75 |

Table S6: Similarity factor  $f_2$  of VEGF release curves from microspheres after various months of storage at -20 °C and VEGF release curves from microspheres after preparation and freeze-drying (batch 3).

| storage time | $f_2$ |
|--------------|-------|
| 1 month      | 63    |
| 2 months     | 68    |
| 3 months     | 59    |
| 6 months     | 73    |
| 9 months     | 65    |

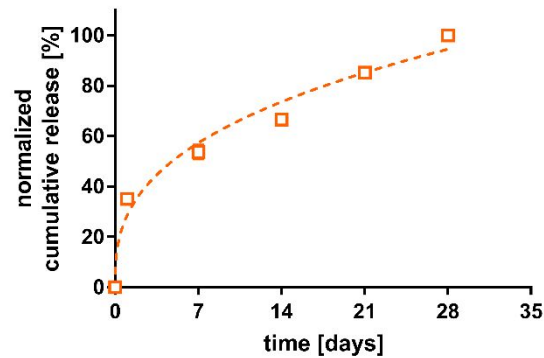

Figure S9: Normalized cumulative release profiles of VEGF from microspheres. Release was performed at 37 °C in bioactivity IVR buffer (PBS pH 7.4, supplemented with 0.5% BSA, 30 µg/ml and 15 ng/ml amphotericin). Korsmeyer-Peppas model fitting (orange dotted line): correlation coefficient ( $R^2$ ): 0.98, Diffusional exponent ( $n$ ):  $0.36 \pm 0.05$ , 95% confidence interval: 0.22 – 0.55.



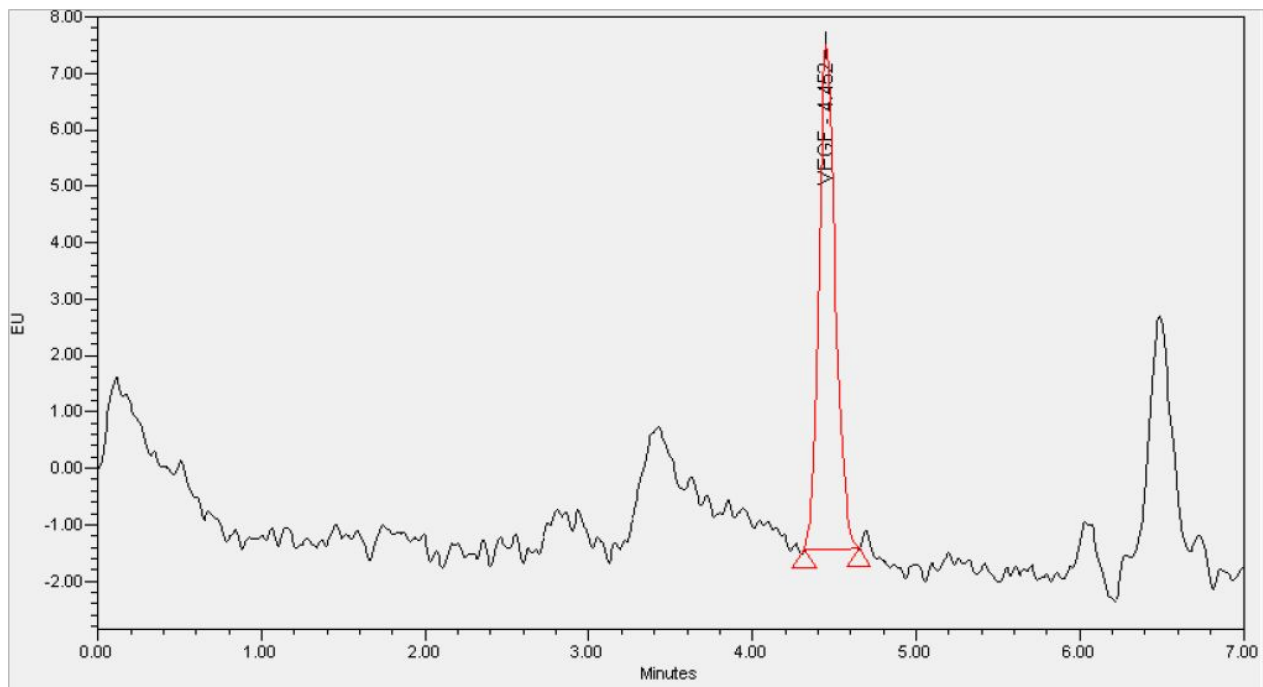

Figure S10: Representative SE-UPLC chromatogram for VEGF quantification. Peaks at 3.5 minutes, 6 minutes and 6.5 minutes have not been identified.
